# 1 **Real-world gait and turning in individuals scheduled for total** 2 **knee arthroplasty**

3 R.J. Boekesteijn<sup>1,2</sup>, N.L.W. Keijsers<sup>1,2,3</sup>, K. Defoort<sup>4</sup>, M. Mancini<sup>5</sup>, F.J. Bruning<sup>1</sup>,  
4 M. El-Gohary<sup>6</sup>, A.C.H. Geurts<sup>2</sup>, K. Smulders<sup>1</sup>

5

6

7 <sup>1</sup> = Department of Research, Sint Maartenskliniek, Nijmegen, The Netherlands

8 <sup>2</sup> = Department of Rehabilitation, Donders Institute for Brain Cognition and Behaviour, Radboud  
9 University Medical Center, The Netherlands

10 <sup>3</sup> = Department of Sensorimotor Neuroscience, Donders Institute for Brain, Cognition and Behaviour,  
11 Radboud University, Nijmegen, The Netherlands.

12 <sup>4</sup> = Department of Orthopedic Surgery, Sint Maartenskliniek, Nijmegen

13 <sup>5</sup> = Department of Neurology, School of Medicine, Oregon Health & Science University, Portland

14 <sup>6</sup> = APDM Wearable Technologies, a Clario company, Portland, Oregon

15

16 Correspondence to: R.J. Boekesteijn, ([ramonboekesteijn@gmail.com](mailto:ramonboekesteijn@gmail.com)), department of Research, Sint  
17 Maartenskliniek, P.O. box 9011, 6500 GM, Nijmegen, the Netherlands

18 **Abstract**

19

20 *Objective:* To compare real-world gait and turning between individuals scheduled for total knee  
21 arthroplasty (TKA) and healthy controls, using continuous monitoring with inertial measurement units  
22 (IMUs).

23 *Design:* Real-world gait and turning data were collected for 5-7 days in individuals scheduled  
24 for TKA (n=34) and healthy controls in the same age range (n=32) using IMUs on the feet and lower  
25 back. Gait and turning parameters were compared between groups using a linear regression model.  
26 Data was further analyzed by stratification of gait bouts based on bout length, and turns based on  
27 turning angle and turning direction.

28 *Results:* Dominant real-world gait speed was 0.21 m/s lower in individuals scheduled for TKA  
29 compared to healthy controls. The between-group difference in gait speed was -0.10 m/s for bouts  
30 containing 0-10 strides and -0.15 m/s for bouts with 160+ strides. Stride time was 0.05 s higher in  
31 individuals scheduled for TKA. Step time asymmetry was not different between the groups. Regarding  
32 walking activity, individuals scheduled for TKA walked 72 strides/hour less than healthy controls, and  
33 maximum bout length was 316 strides shorter. Irrespective of the size of the turn, turning velocity was  
34 lower in individuals scheduled for TKA. Turning velocity did not differ between turns over the  
35 affected leg compared to the unaffected leg.

36 *Conclusion:* Individuals scheduled for TKA showed specific walking and turning limitations in the  
37 real-world. Parameters derived from IMUs reflected a rich profile of real-world mobility measures  
38 indicative of walking limitation of individuals scheduled for TKA, which may provide a relevant  
39 outcome dimension for future studies.

40

41 **Keywords:** remote monitoring, gait, turning, inertial sensors, knee osteoarthritis, knee arthroplasty

## 42 **Introduction**

43           Individuals with knee osteoarthritis (OA) have difficulty walking, illustrated by reduced gait  
44 capacity compared to their healthy peers (1, 2). Gait capacity, defined as what people ‘*can do*’, is  
45 essential for activities of daily living and to participate in society (3). These limitations in gait capacity  
46 can translate to a lower gait performance, i.e. to what people ‘*actually do*’ in the real-world, including  
47 a lower walking activity (4, 5). As walking itself may counteract functional decline (6-9), low walking  
48 activity could lead to further worsening of gait capacity in individuals with knee OA. Given this  
49 apparent vicious circle between limitations in gait capacity and walking activity, mitigating walking  
50 limitations is of great importance to individuals with knee OA (10) and constitutes a reason to consider  
51 total knee arthroplasty (TKA) (11, 12). Insights about the extent of walking limitation is therefore  
52 relevant for individuals with knee OA opting for TKA.

53           A drawback of measuring of gait capacity is that it not necessarily corresponds with measures  
54 of gait performance (13, 14). With assessment of gait capacity usually being conducted in gait  
55 laboratories or other relatively controlled settings, its ecological validity may be limited (15, 16).  
56 Furthermore, data collection is typically restricted to a few short bouts of straight-ahead walking. This  
57 does not align with the fact that individuals with knee OA often report problems with longer bout  
58 durations, when pain becomes the dominating factor. Also, the focus on only straight-ahead gait does  
59 not match with real-world walking, when changes in direction are very common (17). Moreover,  
60 turning during walking has been associated with fall risk, which is increased in individuals with OA  
61 (18).

62           Inertial measurement units (IMUs) have facilitated research into real-world mobility, enabling  
63 unobtrusive and continuous recording of gait and turning performance. In contrast to elderly and  
64 neurological populations (13, 19-26), studies evaluating real-world gait and turning in individuals with  
65 knee OA are scarce (27-29). Of these studies, only Chapman *et al.* (27) compared individuals  
66 scheduled for TKA with a healthy control group. However, only knee kinematics were evaluated in  
67 this study (27). Moreover, in this study, the data from different gait bouts were collapsed into one

68 mean value, while the capture of gait during multiple days also enables to differentiate between short  
69 and longer walking periods (20, 22-24, 30).

70 The aim of this study was to compare real-world gait and turning between individuals with  
71 knee OA, who are scheduled for TKA, and healthy individuals. We hypothesized that individuals  
72 scheduled for TKA would show poorer real-world gait and turning metrics compared to healthy  
73 individuals in the same age range. Capitalizing on the rich data set capturing multiple days of activity  
74 for each individual, we also explored the role of gait bout length on between-group differences in gait  
75 performance.

76

## 77 **Methods**

### 78 *Participants*

79 Thirty-four individuals scheduled for TKA and thirty-two healthy individuals participated in  
80 this study. This study was part of a longitudinal study investigating real-life and challenging gait skills  
81 in individuals receiving posterior cruciate retaining TKA (<https://osf.io/ec6nf/>). This study was  
82 powered to detect differences in real-world gait speed between individuals 1 year after TKA compared  
83 to healthy participants. As the difference in real-world gait speed between these groups is likely higher  
84 before than 1 year after TKA, we expected to have sufficient power for the current study. Individuals,  
85 aged 40-80 years, who were candidates for posterior cruciate-retaining TKA at the Sint  
86 Maartenskliniek were screened for eligibility by a research nurse. Eligibility criteria included: 1)  
87 symptomatic and radiographic knee OA (i.e. Kellgren-Lawrence grade  $\geq 2$ ), 2) intact posterior cruciate  
88 ligament, 3) correctable or  $<10^\circ$  rigid varus or valgus deformity of the knee, and 4) stable health  
89 (ASA-score  $\leq 3$ ). Healthy participants did not have a diagnosis of knee OA, and were recruited from  
90 the community, striving for a similar distribution of age and sex as our study group with individuals  
91 scheduled for TKA. Participants were excluded based on the following criteria: 1) BMI  $> 35 \text{ kg/m}^2$ , 2)  
92 moderate to severe knee, hip or ankle pain defined as an average score  $>4$  on items 3-6 of the Short  
93 Brief Pain Inventory; excluding the knee indexed for TKA, 3) previous knee, hip, or ankle joint

94 replacement, 4) any other musculoskeletal, neurological, or uncorrected visual disorder impairing gait  
95 or balance. This study was approved by the CMO Arnhem Nijmegen (2019-5824). All participants  
96 provided written informed consent and all procedures were in accordance with the Declaration of  
97 Helsinki. This sub-analysis was pre-registered on OSF (<https://osf.io/dawv6>).

98

99 *Data collection*

100 *Clinical assessment*

101 Anterior-posterior X-rays of the knee were obtained through regular care and were graded by  
102 an experienced orthopedic surgeon (KD) using the Kellgren and Lawrence classification system (31).  
103 Anthropometric measurements, including height, body mass, and BMI were obtained pre-operatively,  
104 which was 1.8 months (IQR = 1.5) before TKA. Both for individuals scheduled for TKA and healthy  
105 controls, pain scores during activity and rest over the last week were obtained using a numeric rating  
106 scale (NRS), with a range 0-10 with higher scores indicating higher pain ratings. For individuals  
107 scheduled for TKA, the Knee injury and Osteoarthritis Outcome Score – Physical Function shortform  
108 (KOOS-PS) (32) and Knee Society Score (KSS) (33) were also obtained. KOOS-PS scores were  
109 transformed to a 0-100 scale with a score of 100 representing no difficulty. For the KSS, only the  
110 clinical and functional score were obtained (both on a 0-100 scale) with 100 representing best  
111 function.

112

113 *Real-world gait and turning assessment*

114 Participants wore 3 IMUs, two of which were embedded in instrumented socks (prototype  
115 developed by APDM Wearable Technologies, Portland, OR, USA; similar as in (26)) (Figure 1) and  
116 one was placed on the lower back at the sacrolumbar level (Opal v2, APDM Wearable Technologies,  
117 Portland, OR, USA). The IMUs in the socks were placed on the dorsum of both feet. Participants  
118 started wearing the sensors the day after the clinical assessments were performed. Participants wore  
119 the sensors during daytime for a total period of 5-7 days, always including at least one weekend day.

120 Participants were instructed to start wearing the sensors in the morning, when they started performing  
121 their daily activities. Battery life of the sensors was approximately 10-12 hours. Sensor batteries were  
122 charged overnight. All data was stored on a local memory drive (8 GB) embedded in the sensors.  
123 When data collection was completed, sensors were returned via a postal office after which data was  
124 transferred to a desktop computer for offline processing.

125

### 126 *Data processing and analysis*

127 Sensor data were processed using algorithms described in Shah *et al.* (25). Using a time  
128 domain approach, alternating periods of movement and stillness – corresponding to stance and swing –  
129 were identified from accelerometer and gyroscope signals from the feet to detect potential gait bouts.  
130 Individual strides were combined into the same gait bouts as long as the duration between strides was  
131 less than 2.5 seconds. Subsequently, all gait bouts containing more than 3 strides were processed via  
132 the Mobility Lab algorithm (APDM Wearable Technologies, Portland, OR) to compute spatiotemporal  
133 gait parameters for each stride per gait bout (34). This algorithm has shown good concurrent validity  
134 and acceptable absolute errors compared to a gold standard pressure mat system (34). In older adults,  
135 absolute errors were -0.11 m/s for gait speed (ICC = 0.934) and 0.01 s for stride time (ICC = 0.998).  
136 Turns during walking were identified from the gait bouts based on the gyroscope data of the sensor on  
137 the lower back, using algorithms described in (35). This algorithm looks for periods where the angular  
138 velocity around the vertical axis exceeds 15°/s. The start and end of the turn are defined by the point  
139 where the angular velocity around the vertical axis drops below 5°/s. Turns with an angle larger than  
140 45° and a duration between 0.5 and 10 seconds were labeled as valid turns. Compared to an optical  
141 motion capture system, this algorithm had a sensitivity of 0.90 and specificity of 0.75 (35).

142 For each individual, a normalized frequency distribution of gait speed of all included strides  
143 was constructed. From this distribution, the following parameters were determined: real-world gait  
144 speed defined as the dominant peak of the distribution, maximum real-world gait speed defined as the  
145 95<sup>th</sup> percentile of frequency distribution., and the interquartile range (IQR) of the distribution. Based

146 on previous studies reporting a bimodal distribution for real-world gait speed (13, 36), we opted for  
147 the value at the dominant peak to approximate real-world gait speed. Stride time was calculated as the  
148 median of the stride times of all collected strides per participant, as this parameter did not follow a  
149 bimodal distribution. Step time asymmetry was defined as the difference in step time between the  
150 affected leg and the unaffected leg, divided by the mean value, multiplied by 100%. Parameters  
151 reflecting walking activity included the maximum gait bout length of all included gait bouts over all  
152 days, the average number of gait bouts per monitored hour, and number of strides per monitored hour.  
153 In order to study the effect of gait bout length on gait speed, we first evaluated availability of gait data  
154 for bouts of a specific length. This analysis was used to define 6 bins (i.e. 0-10, 11-20, 21-40, 41-80,  
155 81-160, and 160+ strides). For each bin, the average gait speed of all gait bouts was taken.

156 For all identified turns per participant, the maximum turning velocity was derived from the  
157 transversal angular velocity signal of the IMU on the lower back. For each participant, a frequency  
158 distribution of this parameter was constructed. The median of this distribution was chosen to  
159 characterize turning velocity. In addition, the number of turns per monitored hour was compared  
160 between groups. Turning velocity was analyzed separately for turns over affected and unaffected leg  
161 for individuals scheduled for TKA, whereas for healthy controls the average over all turns was used.  
162 To better evaluate if group differences in turning velocity might have been due to differences in the  
163 size of the turning angle (21), an exploratory analysis was performed by categorizing turns based on  
164 turning angles < 90 degrees, 90-180 degrees, or >180 degrees. Post-processing of gait and turning  
165 parameters was performed in Python 3.8.3.

166

### 167 *Statistical analysis*

168 Gait and turning parameters were compared between groups using a linear regression model  
169 with the specific gait or turning parameter as dependent variable, group as the between-group factor,  
170 and age, sex, and height as covariates. In case model assumptions (i.e. normal distribution of the  
171 residuals) were violated, data was log-transformed. Estimates were back transformed by taking the

172 exponent of the estimate. If model assumptions were still not met, groups were compared using the  
173 Mann-Whitney U test. Furthermore, to study the effect of gait bout length on gait speed, an  
174 independent samples t-test was conducted for each bin that contained at least data from 70% of all  
175 participants. When parametric testing was possible, between-group differences were reported as mean  
176 differences (i.e. individuals scheduled for TKA - healthy participants) with 95% confidence intervals.  
177 Statistical analyses were conducted in RStudio using the stats package (version 4.1.2).

178

## 179 **Results**

### 180 *Participant characteristics*

181 Participant characteristics are provided in Table 1. Individuals scheduled for TKA had on  
182 average higher body mass and BMI, and experienced more pain during rest and activity compared to  
183 healthy controls. Monitored time was similar between the two groups and corresponded to  
184 approximately 10-12 hours/day of monitoring per participant. Data of one healthy control could not be  
185 analyzed due to an error in one of the sock sensors. Furthermore, for one participant scheduled for  
186 TKA turning data was lacking due to a lumbar sensor error.

187

### 188 *Differences in real-world gait parameters*

189 Distributions of real-world gait speed are provided on an individual level in Figure 2. In most  
190 individuals, the data distribution was left-skewed, with a wide range of gait speeds for each  
191 participant. The value at the dominant peak was 0.21 m/s ( $p < 0.001$ ) lower in individuals scheduled for  
192 TKA compared to healthy controls. Similarly, values at the 95<sup>th</sup> percentile were 0.17 m/s (95% CI:  
193 0.09; 0.25,  $p < 0.001$ ) lower in individuals scheduled for TKA. No difference between the two groups  
194 was observed in the IQR of the distribution (Table 2). Furthermore, individuals scheduled for TKA  
195 walked with a higher stride time (median diff = 0.05 s,  $p = 0.003$ ) than healthy controls (Figure 3D).  
196 Step duration asymmetry was not different between the two groups (mean diff = 0.6 %, 95% CI: -0.9;  
197 2.0,  $p = 0.426$ ; Figure 3E).



198 With respect to parameters related to walking activity, maximum gait bout length was lower in  
199 individuals scheduled for TKA (median diff = 316 strides,  $p = 0.005$ ; Figure 3F). Although there was  
200 no difference in the number of gait bouts per hour (mean diff = -0 bouts/hour, 95% CI = -1; 1,  $p =$   
201 0.904; Figure 3G), the number of strides per hour was lower in individuals scheduled for TKA  
202 compared to healthy controls (median diff = -72 strides,  $p < 0.001$ ; Figure 3H).

203

#### 204 *Differences in real-world turning parameters*

205 For turning velocity, individual data distributions are shown in Figure 2. Velocity was not  
206 different between turning over the affected vs. the unaffected leg in individuals scheduled for TKA  
207 (mean diff = 1.4 deg/s; 95% CI = -0.0; 2.7,  $p=0.053$ ; Figure 4A). Compared to healthy controls,  
208 turning velocity for turns over the affected leg (mean diff = -6.3 deg/s, 95% CI = -11.6; -1.0,  $p =$   
209 0.020) as well as for turns over the unaffected leg (mean diff = -7.7 deg/s; 95 CI: -12.9; -2.4,  $p =$   
210 0.005) was lower than in healthy participants. Further exploration of this data revealed that turning  
211 velocity increased with larger turning angles. The direction of the group differences was similar for  
212 different angle sizes (Figure 4C-E). The number of turns per hour was not different between  
213 individuals scheduled for TKA and healthy controls (mean diff = -1.8 turns; 95% CI: -7.2; 3.7,  $p =$   
214 0.520; Figure 4B).

215

#### 216 *Effect of gait bout length on gait parameters*

217 To determine the effect of gait bout length on gait speed, we first evaluated the presence of  
218 gait bouts of different lengths in both groups. Definition of the final bin was based on a cut-off value  
219 of 70% data availability for each of the groups. At a final bin size of 160+ strides, 71% of individuals  
220 scheduled for TKA and 83% of healthy individuals had data available (Figure 5). From Figure 5, it can  
221 also be observed that the group scheduled for TKA had smaller maximum bout lengths than the  
222 healthy control group.

223 Analysis of gait speed depending on bout length revealed that for both individuals scheduled  
224 for TKA and healthy participants, gait speed was higher for longer bout lengths (Figure 6). More  
225 specifically, in individuals scheduled for TKA gait speed increased from  $0.86 \pm 0.12$  m/s for bouts  
226 between 0-10 strides, to  $1.18 \pm 0.13$  m/s for bouts longer than 160 strides. In healthy controls, gait  
227 speed changed from  $0.96 \pm 0.16$  m/s for bouts between 0-10 strides to  $1.33 \pm 0.15$  m/s for bouts longer  
228 than 160 strides. Mean differences between groups were  $-0.10$  m/s for the shortest gait bouts and  $-0.15$   
229 m/s for the longest gait bouts (Figure 6).

230

## 231 Discussion

232 In this study, we provide a detailed account of real-world gait and turning performance in  
233 individuals scheduled for TKA. Consistent with our hypothesis, real-world gait and turning  
234 performance of individuals scheduled for TKA was markedly poorer than healthy controls, evidenced  
235 by a lower gait speed, a lower turning velocity, a lower maximum gait bout length, and less strides per  
236 hour. In addition, the group difference in real-world gait speed was  $-0.10$  m/s for shortest gait bouts  
237 and  $-0.15$  m/s for the longest gait bouts. Notably, individuals scheduled for TKA did not walk with  
238 higher step time asymmetry compared to healthy participants.

239 Individuals scheduled for TKA had on average a  $0.21$  m/s lower dominant walking speed than  
240 their healthy peers. Similar differences have been reported for gait speed in supervised settings (i.e.  
241 gait capacity) (1, 2). Not only the value at the peak of the distribution (i.e. the most frequently  
242 observed gait speed per individual), was lower in individuals scheduled for TKA, but also the 95<sup>th</sup>  
243 percentile of the distribution (resembling gait capacity (13, 37)) was lower. In combination with our  
244 finding that the IQR was not different between groups, these results indicate that in the group of  
245 individuals scheduled for TKA the whole distribution of individual gait speeds was shifted towards  
246 lower values. With the median group difference in stride time being  $0.05$ s, this difference in gait speed  
247 can be explained as a combined effect of longer stride times and shorter stride lengths.

248 Continuous monitoring of walking enabled a profound analysis of the potential factors  
249 underlying differences in gait speed between individuals scheduled for TKA and their healthy peers. A  
250 major advantage of this data capture mode is the possibility to evaluate the effect of gait bout length  
251 on the derived gait speed. In line with previous studies (23, 24, 30), we found that in both groups gait  
252 speed scaled with bout length. The between-group difference became somewhat larger with increasing  
253 bout length, although the magnitude of this effect was relatively small (i.e. from -0.10 m/s in the  
254 shortest gait bouts to -0.15 m/s in the longest gait bouts) and was lower than the overall group  
255 difference in gait speed. However, it is important to note that longer, uninterrupted gait bouts were  
256 scarce in individuals scheduled for TKA. Together, these results may indicate that the overall mean  
257 group difference in gait speed can partly be explained by the finding that individuals with advanced  
258 knee OA walk shorter distances per gait bout. This latter finding is consistent with low activity levels  
259 observed in knee OA groups (38), and with the lower number of steps taken as observed in the current  
260 as well as in other studies (4, 5).

261 In line with a previous meta-analysis of studies measuring gait capacity (2), there was no  
262 group difference in step time asymmetry. Although asymmetries in knee joint loading (39) and  
263 kinematics (40) have been reported in individuals with unilateral knee OA, this does not seem to be  
264 reflected in temporal asymmetries, particularly given that mean asymmetry was close to zero (i.e.  
265 perfect symmetry) in the current study. This finding is also consistent with our data collected during a  
266 2-minute walk test (41).

267 In addition to real-world gait parameters, turning velocity was lower in individuals scheduled  
268 for TKA than in healthy controls, irrespective of the size and direction of the turn. Individuals  
269 scheduled for TKA may thus exploit a generally more cautious turning strategy. In a previous study,  
270 we also found slower turning in individuals scheduled for TKA for 180 degree turns during a 2-minute  
271 walking trial (42). Importantly, lower real-world turning velocity has been associated with a higher fall  
272 risk (21, 43), adding relevance to these findings. The absence of a difference between turning in the  
273 direction of the affected vs. the unaffected leg in individuals scheduled for TKA may not be

274 surprising, given that compensation is possible as both legs are involved in making the turn, which  
275 typically consist of 2-4 steps according to real-world data (21, 43).

276 Our findings hold important clinical relevance. For individuals with knee OA, walking activity  
277 is important to protect against further disease progression (6-9). Moreover, individuals scheduled for  
278 TKA list improving walking ability as a main treatment goal (11, 44). Our data clearly indicate  
279 walking limitations for the average individual scheduled for TKA. In fact, most individuals scheduled  
280 for TKA did not show uninterrupted gait bouts lasting longer than 10 minutes, which may be a  
281 limiting factor for recreational walking or purposeful trips to, for example, a shopping center. On the  
282 other hand, a large proportion of individuals scheduled for TKA walked at relatively high speed (i.e. >  
283 1.25 m/s (3)), and were well able to scale up gait speed with increasing bout length. In this group, the  
284 room for improvement is limited, which is important information when discussing expectations  
285 regarding knee arthroplasty.

286 This study has a number of limitations that merit attention. First, as of yet, no consensus or  
287 standard exists on how to process real-world gait data collected with IMUs. Choices made in the  
288 sensor configuration and processing algorithms – including sensor location (i.e. lower back vs. feet),  
289 definitions of gait bout start and stops, and degrees of freedom in heading direction – may have had a  
290 substantial impact on the derived gait and turning performance parameters. Although such influences  
291 on the between-group comparisons in our study are likely small, they limit comparison of results with  
292 other studies that used different sensor configurations and/or algorithms (13, 20, 28-30). Secondly,  
293 battery life of the sensors was limited to 10-12 hours. Thus, we did not capture gait and turning data  
294 for the full day. However, total monitored time was similar between groups, and quantitative  
295 parameters were normalized to the number of hours. Nevertheless, this limits interpretation of our  
296 results in terms of physical activity, for example when comparing our data to guidelines for the  
297 recommended number of steps per day (38). Finally, our sample included individuals with unilateral  
298 knee OA without previous joint replacement surgery in any other joint. This resulted in a selected  
299 group, not representative for all individuals scheduled for TKA, who may have a relatively high  
300 walking performance. Nonetheless, compared to the Dutch population undergoing TKA, our group

301 only had a slightly lower age (i.e. 4 years), while BMI and male/female ratio were relatively similar  
302 (45).

303

### 304 **Conclusion**

305 Real-world monitoring of gait and turning using IMUs revealed that individuals scheduled for  
306 TKA had lower walking activity and lower real-world gait and turning speed compared to healthy  
307 peers of similar age. Parameters derived from IMUs provided a rich profile of real-world mobility  
308 measures that were indicative of walking and turning limitations, which may provide a relevant  
309 dimension for future studies.

310

### 311 **Acknowledgements**

312 We want to thank Edward King for his support with data processing, and Saskia Susan and  
313 Jolanda Rubrech for their contribution to patient recruitment and data management.

314

### 315 **Author contributions**

316 Conception and design: RB, KD, and KS. Obtaining of funding: KD and KS. Collection and  
317 assembly of data: RB. Analysis and interpretation of the data: all authors. Drafting the first version of  
318 the article: RB. Critical revision of the article and approval of final version: all authors. Supervision:  
319 NK, AG, and KS. Technical support: ME.

320

### 321 **Role of the funding source**

322 Smith & Nephew sponsored this study. The funders had no role in the design and conduct of  
323 this study.

324

325 **Conflict of interest**

326 Mahmoud El-Gohary has a significant financial interest in APDM Wearable Technologies, a  
327 company that may have a commercial interest in the results of this research and technology.

328

329 **References**

- 330 1. Mills K, Hunt MA, Ferber R. Biomechanical deviations during level walking associated with  
331 knee osteoarthritis: a systematic review and meta-analysis. *Arthritis Care Res (Hoboken)*.  
332 2013;65(10):1643-65.
- 333 2. Boekesteijn RJ, van Gerven J, Geurts ACH, Smulders K. Objective gait assessment in  
334 individuals with knee osteoarthritis using inertial sensors: A systematic review and meta-analysis. *Gait  
335 & Posture*. 2022;98:109-20.
- 336 3. Fritz S, Lusardi M. White Paper: “Walking Speed: the Sixth Vital Sign”. *Journal of Geriatric  
337 Physical Therapy*. 2009;32(2).
- 338 4. Verlaan L, Bolink SA, Van Laarhoven SN, Lipperts M, Heyligers IC, Grimm B, et al.  
339 Accelerometer-based Physical Activity Monitoring in Patients with Knee Osteoarthritis: Objective and  
340 Ambulatory Assessment of Actual Physical Activity During Daily Life Circumstances. *Open Biomed  
341 Eng J*. 2015;9:157-63.
- 342 5. Winter CC, Brandes M, Müller C, Schubert T, Ringling M, Hillmann A, et al. Walking ability  
343 during daily life in patients with osteoarthritis of the knee or the hip and lumbar spinal stenosis: a cross  
344 sectional study. *BMC Musculoskeletal Disorders*. 2010;11(1):233.
- 345 6. Lo GH, Vinod S, Richard MJ, Harkey MS, McAlindon TE, Kriska AM, et al. Association  
346 Between Walking for Exercise and Symptomatic and Structural Progression in Individuals With Knee  
347 Osteoarthritis: Data From the Osteoarthritis Initiative Cohort. *Arthritis & Rheumatology*.  
348 2022;74(10):1660-7.

- 349 7. Sun R, Tomkins-Lane C, Muaremi A, Kuwabara A, Smuck M. Physical activity thresholds for  
350 predicting longitudinal gait decline in adults with knee osteoarthritis. *Osteoarthritis and Cartilage*.  
351 2021;29(7):965-72.
- 352 8. White DK, Tudor-Locke C, Zhang Y, Fielding R, LaValley M, Felson DT, et al. Daily  
353 walking and the risk of incident functional limitation in knee osteoarthritis: an observational study.  
354 *Arthritis Care Res (Hoboken)*. 2014;66(9):1328-36.
- 355 9. Fenton SAM, Neogi T, Dunlop D, Nevitt M, Doherty M, Duda JL, et al. Does the intensity of  
356 daily walking matter for protecting against the development of a slow gait speed in people with or at  
357 high risk of knee osteoarthritis? An observational study. *Osteoarthritis Cartilage*. 2018;26(9):1181-9.
- 358 10. te Molder MEM, Verhoef LM, Smolders JMH, Heesterbeek PJC, van den Ende CHM.  
359 Prioritization of adverse consequences after total knee arthroplasty contributing to a poor response: A  
360 Best-Worst Scaling Exercise among total knee arthroplasty patients and knee specialists. *The Journal*  
361 *of Arthroplasty*. 2023.
- 362 11. Lange T, Schmitt J, Kopkow C, Rataj E, Günther KP, Lützner J. What Do Patients Expect  
363 From Total Knee Arthroplasty? A Delphi Consensus Study on Patient Treatment Goals. *J*  
364 *Arthroplasty*. 2017;32(7):2093-9.e1.
- 365 12. Latijnhouwers D, Vlieland T, Marijnissen WJ, Damen PJ, Nelissen R, Gademan MGJ. Sex  
366 differences in perceived expectations of the outcome of total hip and knee arthroplasties and their  
367 fulfillment: an observational cohort study. *Rheumatol Int*. 2023;43(5):911-22.
- 368 13. Van Ancum JM, van Schooten KS, Jonkman NH, Huijben B, van Lummel RC, Meskers  
369 CGM, et al. Gait speed assessed by a 4-m walk test is not representative of daily-life gait speed in  
370 community-dwelling adults. *Maturitas*. 2019;121:28-34.
- 371 14. Takayanagi N, Sudo M, Yamashiro Y, Lee S, Kobayashi Y, Niki Y, et al. Relationship  
372 between Daily and In-laboratory Gait Speed among Healthy Community-dwelling Older Adults.  
373 *Scientific Reports*. 2019;9(1):3496.
- 374 15. Warmerdam E, Hausdorff JM, Atrsaei A, Zhou Y, Mirelman A, Aminian K, et al. Long-term  
375 unsupervised mobility assessment in movement disorders. *Lancet Neurol*. 2020;19(5):462-70.

- 376 16. Friesen KB, Zhang Z, Monaghan PG, Oliver GD, Roper JA. All eyes on you: how researcher  
377 presence changes the way you walk. *Scientific Reports*. 2020;10(1):17159.
- 378 17. Glaister BC, Bernatz GC, Klute GK, Orendurff MS. Video task analysis of turning during  
379 activities of daily living. *Gait Posture*. 2007;25(2):289-94.
- 380 18. Doré AL, Golightly YM, Mercer VS, Shi XA, Renner JB, Jordan JM, et al. Lower-extremity  
381 osteoarthritis and the risk of falls in a community-based longitudinal study of adults with and without  
382 osteoarthritis. *Arthritis Care Res (Hoboken)*. 2015;67(5):633-9.
- 383 19. Mancini M, El-Gohary M, Pearson S, McNames J, Schlueter H, Nutt JG, et al. Continuous  
384 monitoring of turning in Parkinson's disease: Rehabilitation potential. *NeuroRehabilitation*.  
385 2015;37:3-10.
- 386 20. Del Din S, Godfrey A, Galna B, Lord S, Rochester L. Free-living gait characteristics in ageing  
387 and Parkinson's disease: impact of environment and ambulatory bout length. *J Neuroeng Rehabil*.  
388 2016;13(1):46.
- 389 21. Leach JM, Mellone S, Palumbo P, Bandinelli S, Chiari L. Natural turn measures predict  
390 recurrent falls in community-dwelling older adults: a longitudinal cohort study. *Scientific Reports*.  
391 2018;8(1):4316.
- 392 22. Storm FA, Nair KPS, Clarke AJ, Van der Meulen JM, Mazzà C. Free-living and laboratory  
393 gait characteristics in patients with multiple sclerosis. *PLOS ONE*. 2018;13(5):e0196463.
- 394 23. Mueller A, Hoefling HA, Muaremi A, Praestgaard J, Walsh LC, Bunte O, et al. Continuous  
395 Digital Monitoring of Walking Speed in Frail Elderly Patients: Noninterventional Validation Study  
396 and Longitudinal Clinical Trial. *JMIR Mhealth Uhealth*. 2019;7(11):e15191.
- 397 24. Shah VV, McNames J, Harker G, Mancini M, Carlson-Kuhta P, Nutt JG, et al. Effect of Bout  
398 Length on Gait Measures in People with and without Parkinson's Disease during Daily Life. *Sensors*  
399 (Basel). 2020;20(20).
- 400 25. Shah VV, McNames J, Mancini M, Carlson-Kuhta P, Nutt JG, El-Gohary M, et al. Digital  
401 Biomarkers of Mobility in Parkinson's Disease During Daily Living. *Journal of Parkinson's Disease*.  
402 2020;10:1099-111.



- 403 26. Shah VV, McNames J, Mancini M, Carlson-Kuhta P, Spain RI, Nutt JG, et al. Laboratory  
404 versus daily life gait characteristics in patients with multiple sclerosis, Parkinson's disease, and  
405 matched controls. *Journal of NeuroEngineering and Rehabilitation*. 2020;17(1):159.
- 406 27. Chapman RM, Moschetti WE, Van Citters DW. Stance and swing phase knee flexion recover  
407 at different rates following total knee arthroplasty: An inertial measurement unit study. *Journal of*  
408 *Biomechanics*. 2019;84:129-37.
- 409 28. Fransen BL, Pijnappels M, Butter IK, Burger BJ, van Dieën JH, Hoozemans MJM. Patients'  
410 perceived walking abilities, daily-life gait behavior and gait quality before and 3 months after total  
411 knee arthroplasty. *Arch Orthop Trauma Surg*. 2022;142(6):1189-96.
- 412 29. Vangeneugden J, Verlaan L, Oomen P, Liu WY, Peters M, Natour N, et al. Signatures of knee  
413 osteoarthritis in women in the temporal and fractal dynamics of human gait. *Clin Biomech (Bristol,*  
414 *Avon)*. 2020;76:105016.
- 415 30. Rehman RZU, Guan Y, Shi JQ, Alcock L, Yarnall AJ, Rochester L, et al. Investigating the  
416 Impact of Environment and Data Aggregation by Walking Bout Duration on Parkinson's Disease  
417 Classification Using Machine Learning. *Frontiers in Aging Neuroscience*. 2022;14.
- 418 31. Kellgren JH, Lawrence JS. Radiological assessment of osteo-arthrosis. *Ann Rheum Dis*.  
419 1957;16(4):494-502.
- 420 32. Perruccio AV, Stefan Lohmander L, Canizares M, Tennant A, Hawker GA, Conaghan PG, et  
421 al. The development of a short measure of physical function for knee OA KOOS-Physical Function  
422 Shortform (KOOS-PS) - an OARSI/OMERACT initiative. *Osteoarthritis Cartilage*. 2008;16(5):542-  
423 50.
- 424 33. Insall JN, Dorr LD, Scott RD, Scott WN. Rationale of the Knee Society clinical rating system.  
425 *Clin Orthop Relat Res*. 1989(248):13-4.
- 426 34. Morris R, Stuart S, McBarron G, Fino PC, Mancini M, Curtze C. Validity of Mobility Lab  
427 (version 2) for gait assessment in young adults, older adults and Parkinson's disease. *Physiological*  
428 *Measurement*. 2019;40(9):095003.
- 429 35. El-Gohary M, Pearson S, McNames J, Mancini M, Horak F, Mellone S, et al. Continuous  
430 Monitoring of Turning in Patients with Movement Disability. *Sensors*. 2014;14(1):356-69.

- 431 36. Atrsaei A, Corrà MF, Dadashi F, Vila-Chã N, Maia L, Mariani B, et al. Gait speed in clinical  
432 and daily living assessments in Parkinson's disease patients: performance versus capacity. *npj*  
433 *Parkinson's Disease*. 2021;7(1):24.
- 434 37. Hendriks MMS, Vos-van der Hulst M, Weijs RWJ, van Lotringen JH, Geurts ACH, Keijsers  
435 NLW. Using Sensor Technology to Measure Gait Capacity and Gait Performance in Rehabilitation  
436 Inpatients with Neurological Disorders. *Sensors*. 2022;22(21).
- 437 38. Wallis JA, Webster KE, Levinger P, Taylor NF. What proportion of people with hip and knee  
438 osteoarthritis meet physical activity guidelines? A systematic review and meta-analysis. *Osteoarthritis*  
439 *and Cartilage*. 2013;21(11):1648-59.
- 440 39. Christiansen CL, Bade MJ, Judd DL, Stevens-Lapsley JE. Weight-bearing asymmetry during  
441 sit-stand transitions related to impairment and functional mobility after total knee arthroplasty. *Arch*  
442 *Phys Med Rehabil*. 2011;92(10):1624-9.
- 443 40. Ismailidis P, Egloff C, Hegglin L, Pagenstert G, Kern R, Eckardt A, et al. Kinematic  
444 changes in patients with severe knee osteoarthritis are a result of reduced walking speed rather than  
445 disease severity. *Gait Posture*. 2020;79:256-61.
- 446 41. Boekesteijn RJ, Smolders JMH, Busch VJJF, Geurts ACH, Smulders K. Independent and  
447 sensitive gait parameters for objective evaluation in knee and hip osteoarthritis using wearable sensors.  
448 *BMC Musculoskeletal Disorders*. 2021;22(1):242.
- 449 42. Boekesteijn R, Smolders J, Busch V, Keijsers N, Geurts A, Smulders K. Objective monitoring  
450 of functional recovery after total knee and hip arthroplasty using sensor-derived gait measures. *PeerJ*.  
451 2022;10:e14054.
- 452 43. Mancini M, Schlueter H, El-Gohary M, Mattek N, Duncan C, Kaye J, et al. Continuous  
453 Monitoring of Turning Mobility and Its Association to Falls and Cognitive Function: A Pilot Study. *J*  
454 *Gerontol A Biol Sci Med Sci*. 2016;71(8):1102-8.
- 455 44. Whitebird RR, Solberg LI, Ziegenfuss JY, Asche SE, Norton CK, Swiontkowski MF, et al.  
456 Personalized outcomes for hip and knee replacement: the patients point of view. *Journal of Patient-*  
457 *Reported Outcomes*. 2021;5(1):116.
- 458 45. LROI. Annual report 2022 2022 [20-6-2023]. Available from: <https://www.lroi-report.nl/>.

459 **Figure legends**

460 **Figure 1:** Overview of the IMUs embedded in socks. The sensor system consisted of a large  
461 casing (positioned above the lateral malleolus) containing the battery and memory drive, which was  
462 connected to the IMU on the dorsum of the foot via a small cable (left panel).

463 **Figure 2:** Ridgeplot showing all individual distributions of real-world gait speed (left panel) and  
464 maximum turning velocity (right panel) for individuals scheduled for TKA (red) and for healthy  
465 controls (green). For individuals scheduled for TKA both turns over the affected and unaffected leg  
466 were included. Data are ordered from low to high based on the value at the dominant peak of real-  
467 world gait speed or the median of maximum turning velocity (exact values are indicated on the y-  
468 axis).

469 **Figure 3:** Violin plots with for all gait parameters with an overlay of individual datapoints.  
470 Mean values are indicated by the large white dots in the distributions, median values by the solid lines,  
471 and 1st and 3rd quartiles are indicated by the dashed lines. P-values of statistical tests are reported in  
472 each panel.

473 **Figure 4:** Violin plots with for all turning parameters with an overlay of individual datapoints.  
474 Mean values are indicated by the large white dots in the distributions, median values by the solid lines,  
475 and 1st and 3rd quartiles are indicated by the dashed lines. P-values of statistical tests are reported in  
476 each panel.

477 **Figure 5:** Availability of gait bouts of a specific bout length in both groups. The dashed line at a  
478 bout length of 160 strides indicates our maximum bin size, with 83% availability in healthy  
479 participants and 71% in individuals scheduled for TKA.

480 **Figure 6:** Effect of bout length on gait speed. In the top panel mean and standard deviations are  
481 displayed for each bin size for both groups. In addition, data availability for each group is indicated in  
482 the top panel as the percentage of individuals for whom data are available in each bin. Mean  
483 differences with 95% confidence intervals are provided in the bottom panel.

484 **Tables**

485 *Table 1:* Baseline characteristics of both study groups.

| <b>Parameter</b>               | <b>Individuals scheduled for TKA (n=34)</b> | <b>Healthy controls (n=31)</b> | <b>Mean difference [95 % CI]</b> |
|--------------------------------|---------------------------------------------|--------------------------------|----------------------------------|
| Age (y)                        | 65 (9)                                      | 65 (10)                        | 0 [-4 ; 5]                       |
| Sex (M:F)                      | 13:21                                       | 12:19                          | -                                |
| Height (m)                     | 1.73 (0.11)                                 | 1.75 (0.07)                    | -0.02 [-0.06; 0.03]              |
| Mass (kg)                      | 86 (15)                                     | 75 (11)                        | 11 [4; 17]                       |
| BMI (kg/m <sup>2</sup> )       | 28.5 (3.4)                                  | 24.5 (3.1)                     | 4.0 [2.4; 5.6]                   |
| KL grade (I:II:III:IV)         | 0:0:10:24                                   | -                              | -                                |
| KOOS-PS (0-100)                | 55 (12)                                     | -                              | -                                |
| KSS – clinical score (0-100)   | 65 (8)                                      | -                              | -                                |
| KSS – functional score (0-100) | 65 (14)                                     | -                              | -                                |
| NRS pain rest (0-10)           | 4.1 (2.5)                                   | 0.5 (1.0)                      | 3.6 [2.7; 4.6]                   |
| NRS pain activity (0-10)       | 6.2 (2.0)                                   | 0.7 (1.0)                      | 5.5 [4.7; 6.3]                   |
| Monitored time (h)             | 60 (17)                                     | 58 (17)                        | 2 [-7; 10]                       |

486 *Note:* Data are provided as mean (SD). BMI = body mass index, KL = Kellgren Lawrence, KOOS-PS = Knee Osteoarthritis  
487 Outcome Score – Physical Function Shortform, KSS = knee society score, NRS = numeric rating scale.

*Table 2:* Detailed output of the statistical models comparing individuals scheduled for TKA and healthy controls. Data are presented as mean (SD) for both groups if not otherwise indicated. In case data were log-transformed or non-parametric tests were conducted, data were presented as median (IQR) (in *italic*).

| Parameter                                      | Individuals scheduled for TKA (n=34) | Healthy controls (n=31) | Median difference | Estimate (95% CI) of the group difference | Test statistic | P-value |
|------------------------------------------------|--------------------------------------|-------------------------|-------------------|-------------------------------------------|----------------|---------|
| Gait speed – value at dominant peak (m/s)      | <i>1.15 (0.17)</i>                   | <i>1.36 (0.28)</i>      | -0.21             | -                                         | U = 840        | <0.001  |
| Gait speed – 95 <sup>th</sup> percentile (m/s) | 1.35 (0.17)                          | 1.53 (0.16)             | -                 | -0.17 (-0.25; 0.09)                       | t(63) = -4.32  | <0.001  |
| Gait speed – IQR (m/s)                         | <i>0.27 (0.08)</i>                   | <i>0.26 (0.10)</i>      | 0.01              | 1.01 (0.86; 1.20)*                        | t(63) = 0.17   | 0.863   |
| Stride time – median (s)                       | <i>1.14 (0.12)</i>                   | <i>1.09 (0.07)</i>      | 0.05              | -                                         | U = 321        | 0.007   |
| Step time asymmetry (%)                        | 1.4 (3.2)                            | 0.6 (2.7)               | -                 | 0.6 (-0.9; 2.0)                           | t(63) = 0.80   | 0.426   |
| Maximum bout length (strides)                  | <i>248 (306)</i>                     | <i>564 (714)</i>        | -316              | 0.52 (0.34; 0.82)*                        | t(63) = -2.93  | 0.005   |
| #Bouts/hour                                    | 6.1 (2.9)                            | 6.1 (2.5)               | -                 | -0.0 (-1.4; 1.3)                          | t(63) = -0.07  | 0.941   |
| #Strides/hour                                  | <i>123 (114)</i>                     | <i>195 (237)</i>        | -72               | 0.55 (0.37; 0.81)*                        | t(63) = -3.08  | 0.003   |
| Maximum turning velocity – median (deg/s)      | 93.1 (10.9)                          | -                       | -                 | Aff vs. HC: -6.3 (-11.5; -1.0)            | t(62) = -2.38  | 0.020   |
| <i>Affected</i>                                | 91.7 (10.7)                          | -                       | -                 | Unaff vs. HC: -7.7 (-12.9; -2.4)          | t(62) = -2.93  | 0.005   |
| <i>Unaffected</i>                              | -                                    | 99.4 (10.1)             | -                 | Aff vs Unaff: 1.4 (-0.0; 2.7)             | t(32) = 2.01   | 0.053   |
| <i>Combined</i>                                |                                      |                         |                   |                                           |                |         |
| #Turns/hour                                    | 24.1 (10.0)                          | 25.8 (11.3)             | -                 | -1.8 (-7.2 ; 3.7)                         | t(62) = -0.65  | 0.520   |

Aff = affected leg, Unaff = unaffected leg, HC = healthy controls

\* = parameter was log-transformed. Estimates should be interpreted as relative change of the parameter compared to the value of healthy control

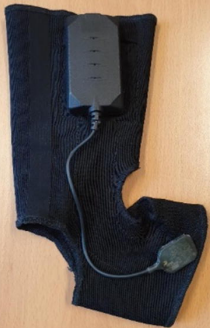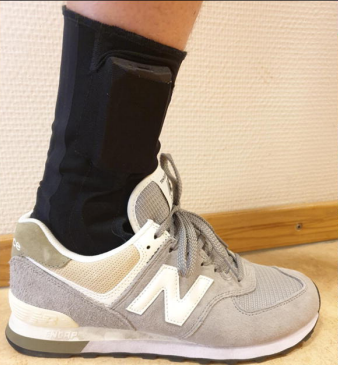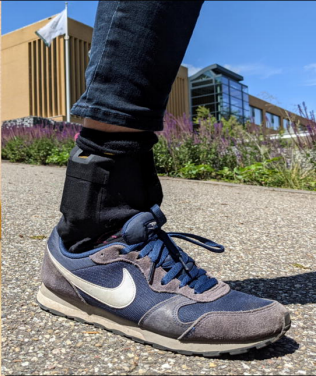

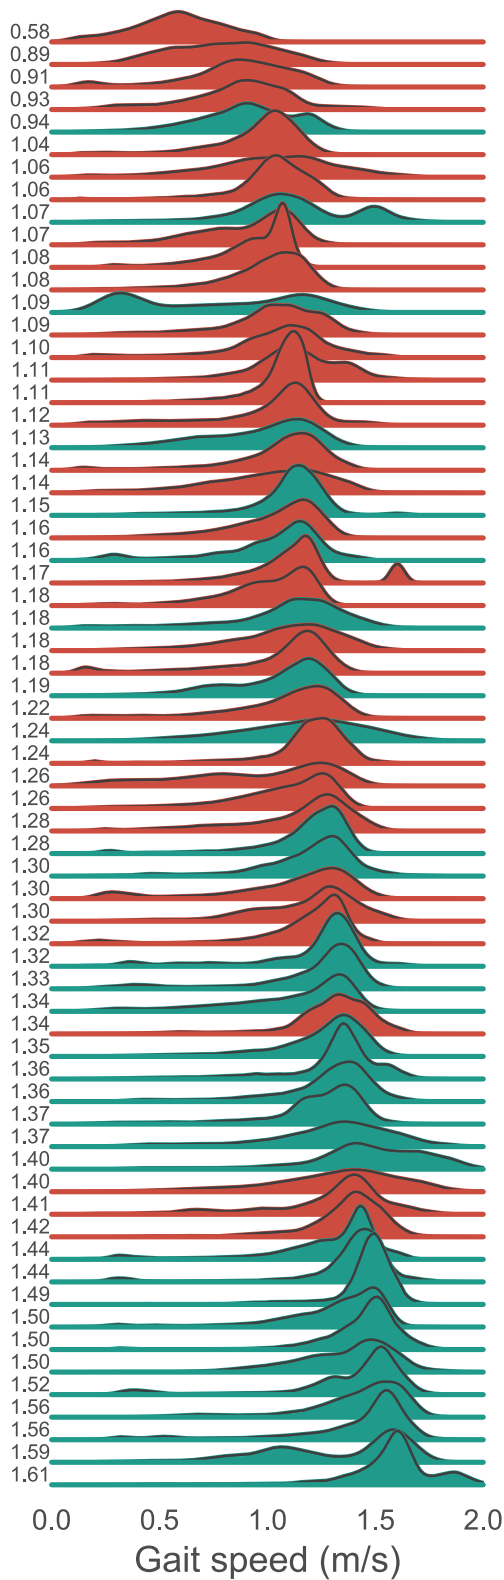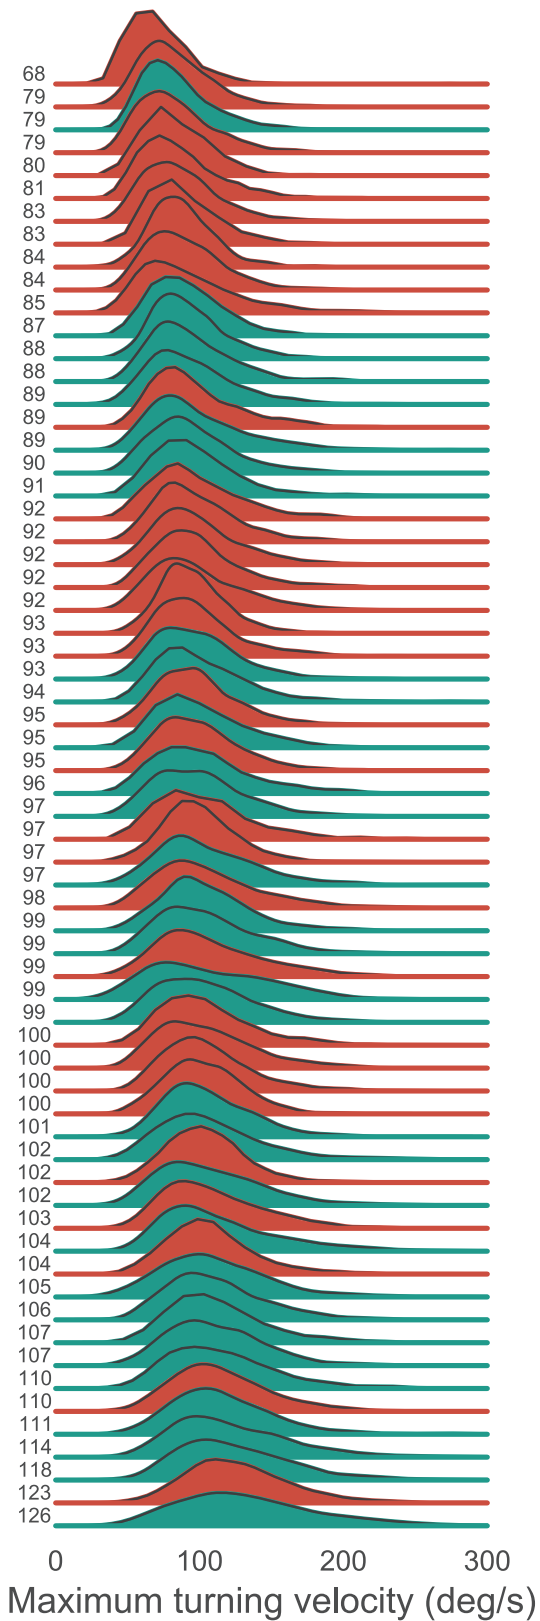

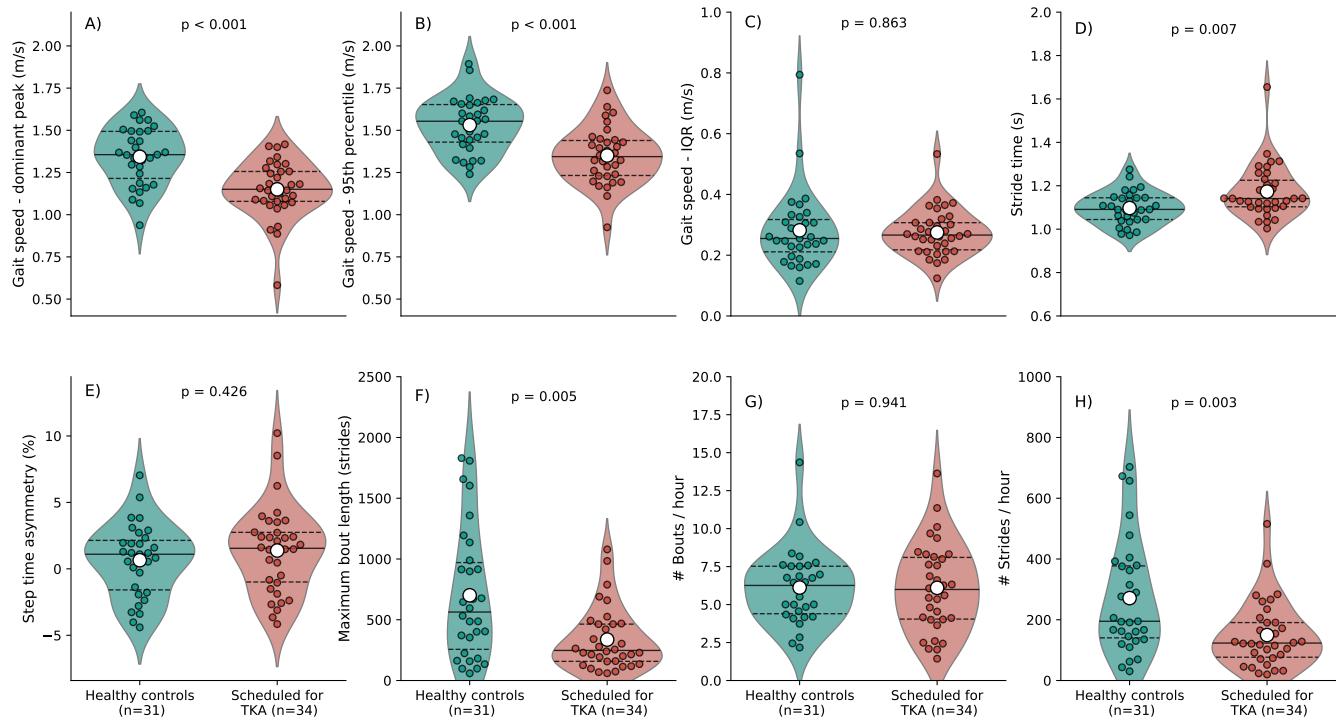



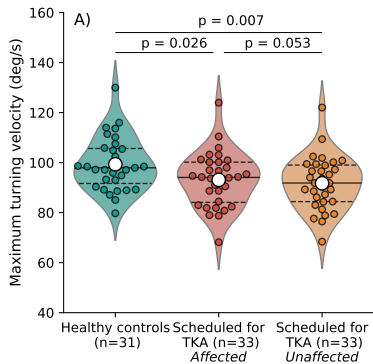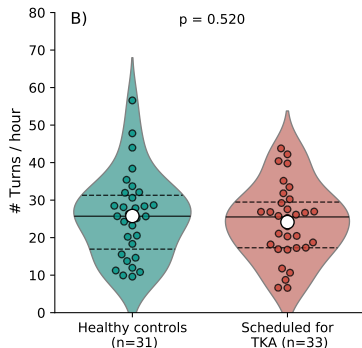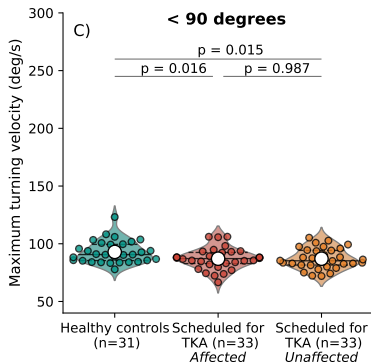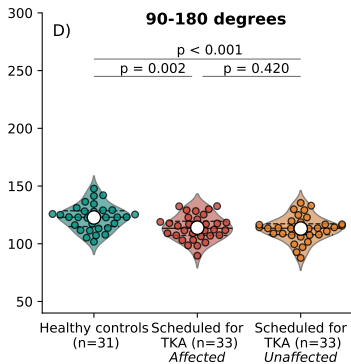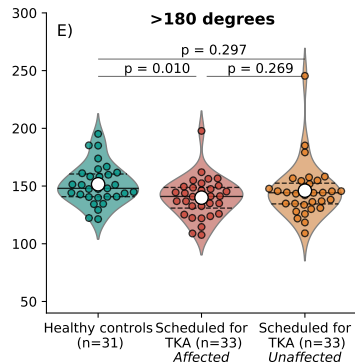

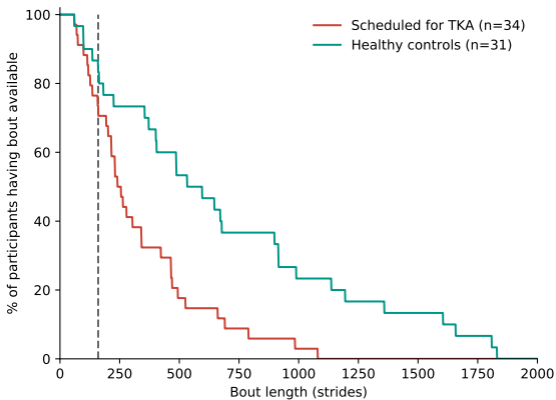

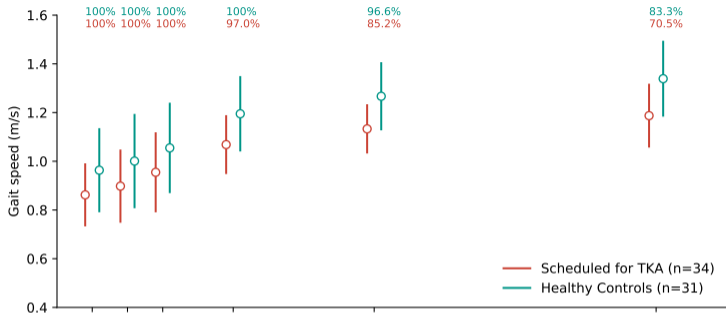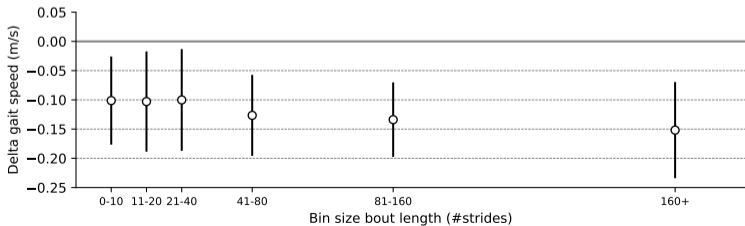

Source: https://medrxiv.org/content/10.1101/2023.09.13.23295243.full.pdf
